# Supplementary material
Source: ML conference proceedings conference paper supplement (https://openreview.net/forum?id=eKVugi5zr0)

(a) Incremental Regret Over Time

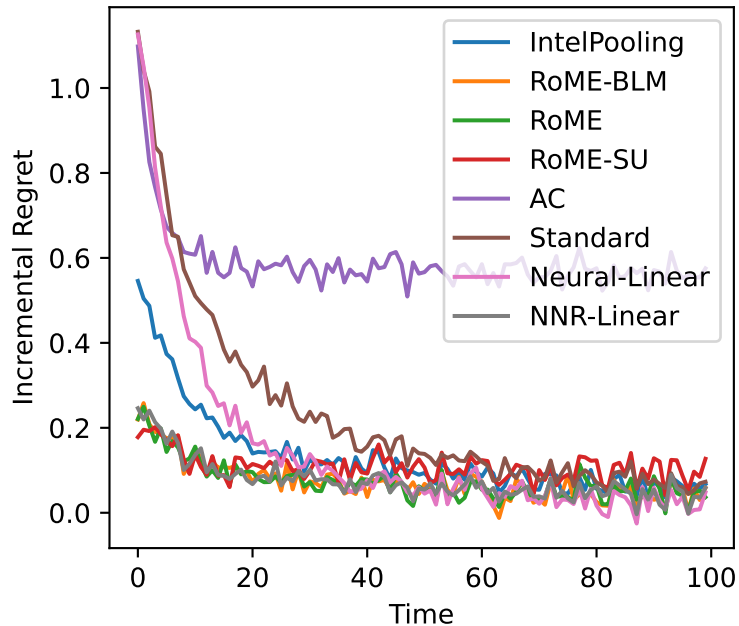

(b) Cumulative Regret Over Time

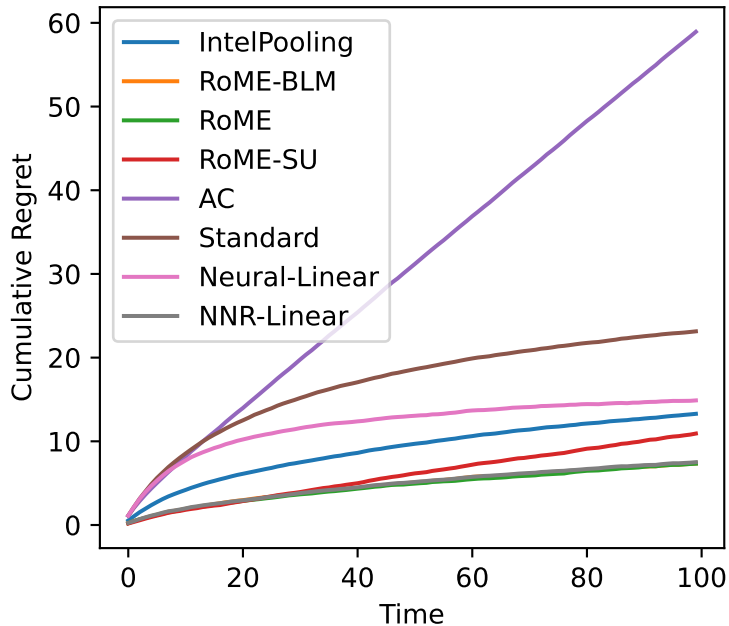

Supplement: supplementary_material [file attachment]

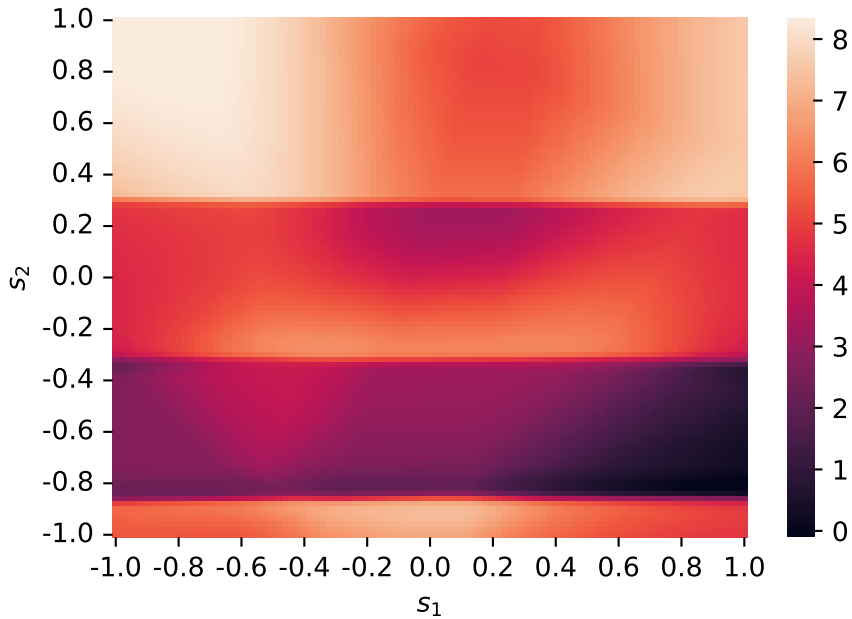

Supplement: supplementary_material [file attachment]

(c) Nonlinear Setting

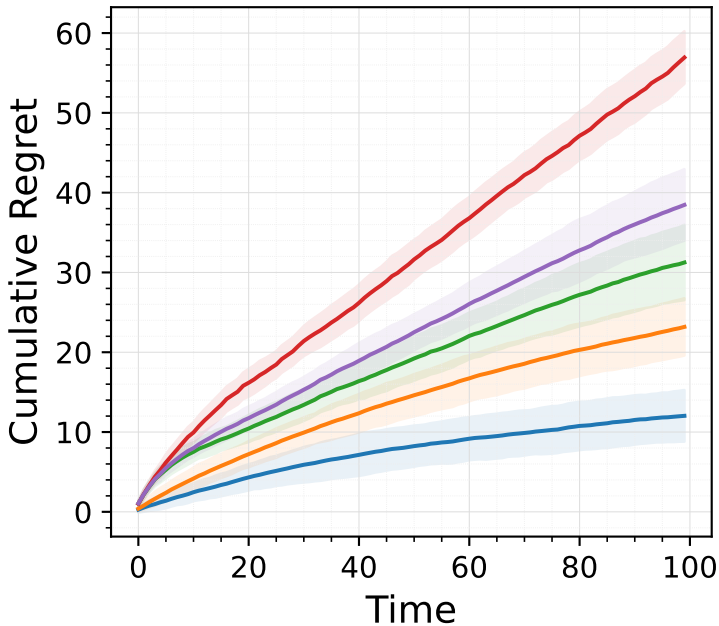

Supplement: supplementary_material [file attachment]

(a) Homogeneous Users

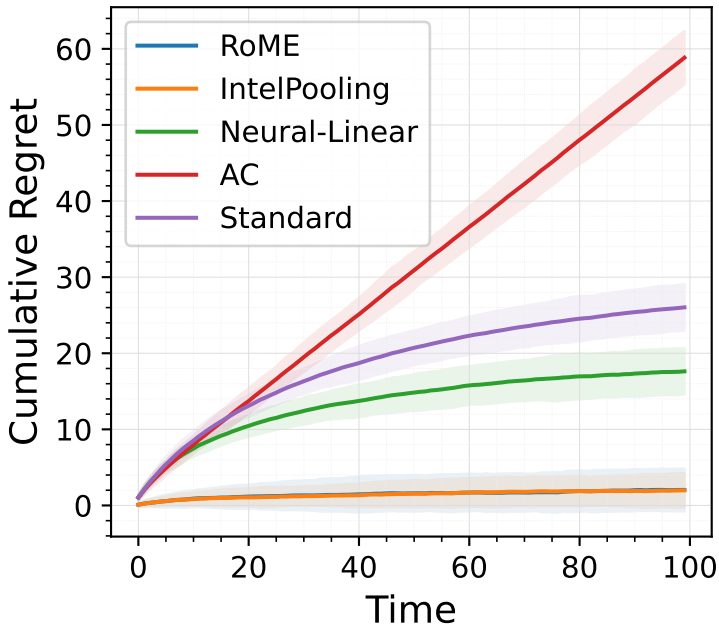

Supplement: supplementary_material [file attachment]

(a) Homogeneous Users

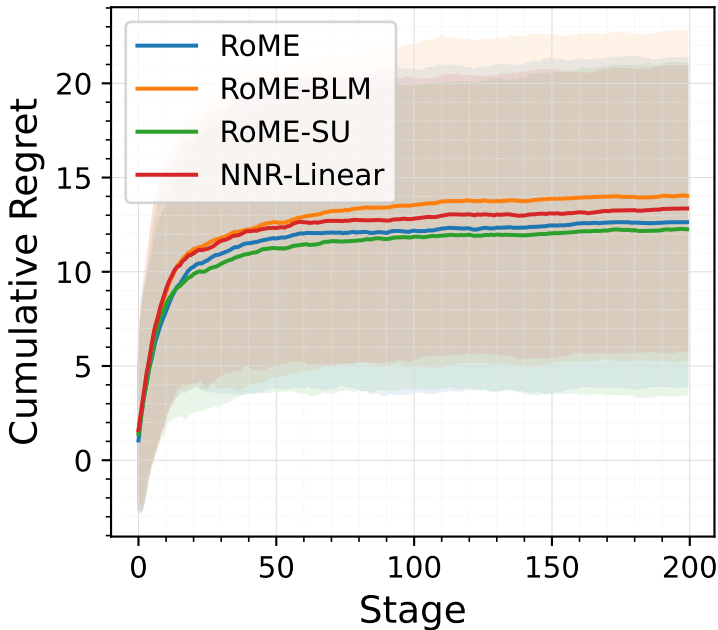

Supplement: supplementary_material [file attachment]

(a) Incremental Regret Over Time

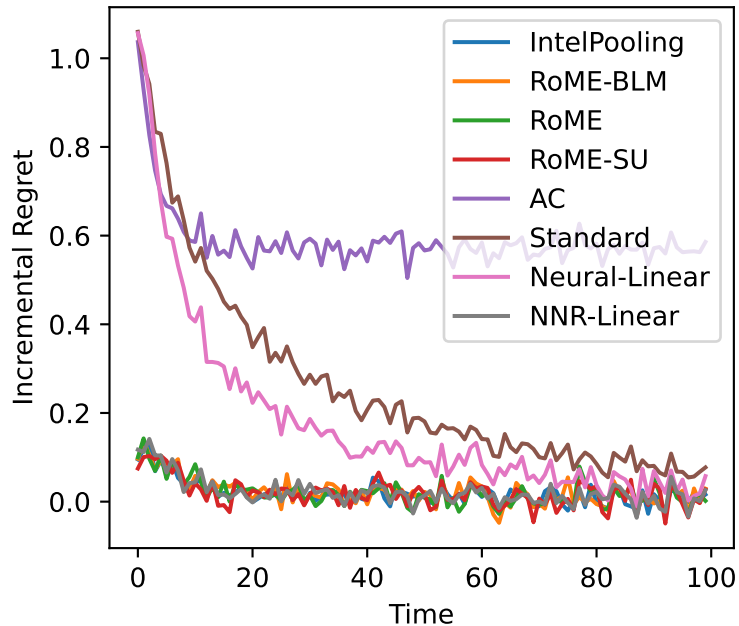

(b) Cumulative Regret Over Time

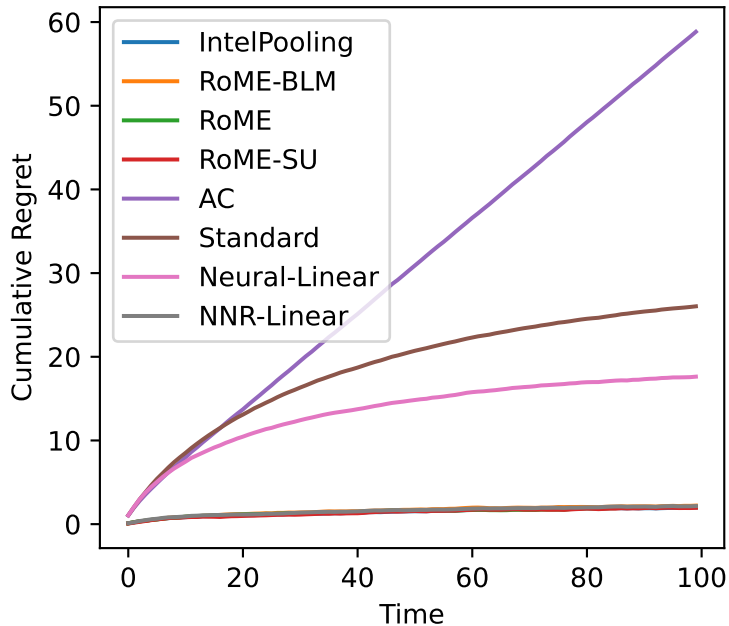

Supplement: supplementary_material [file attachment]

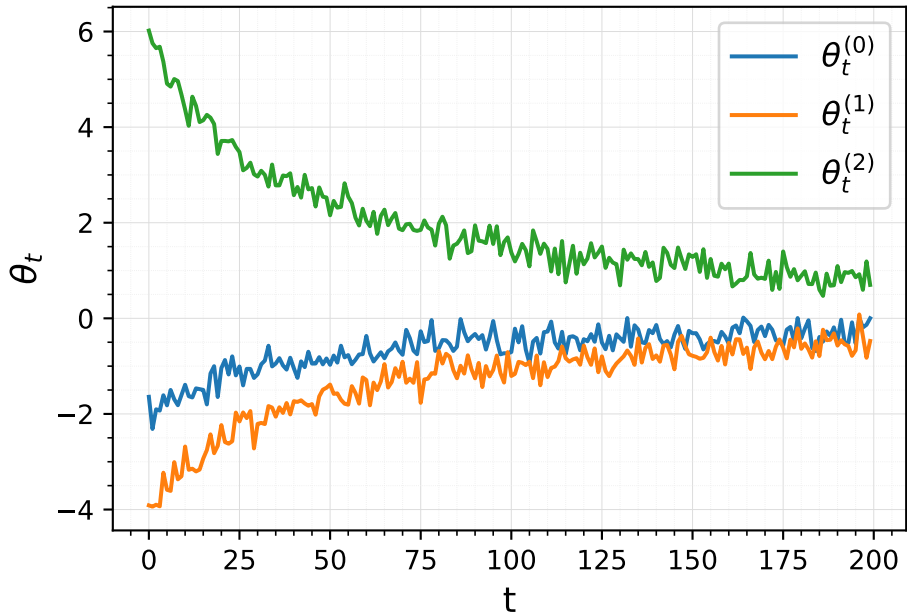

Supplement: supplementary_material [file attachment]

(b) Heterogeneous Users

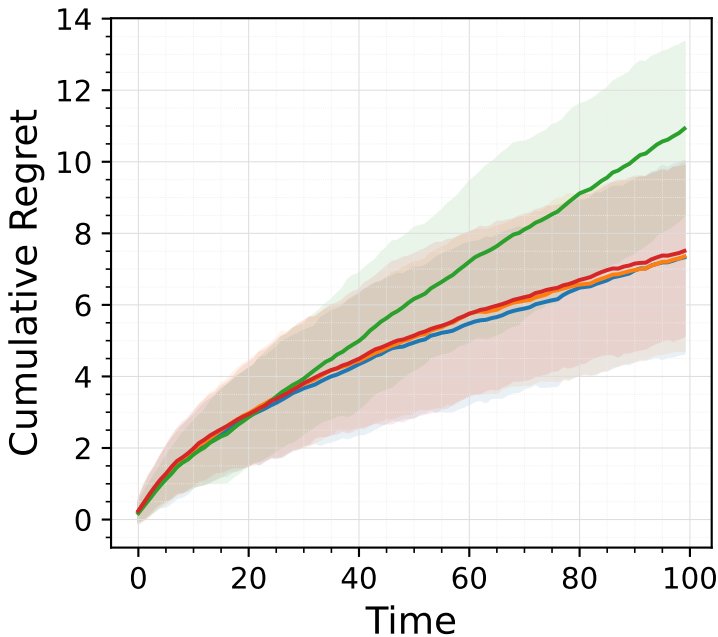

Supplement: supplementary_material [file attachment]

(a) Incremental Regret Over Time

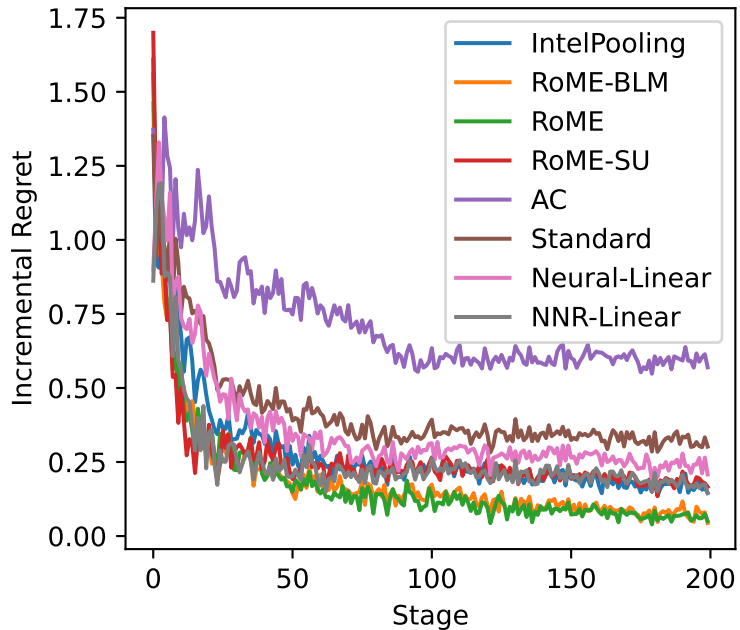

(b) Cumulative Regret Over Time

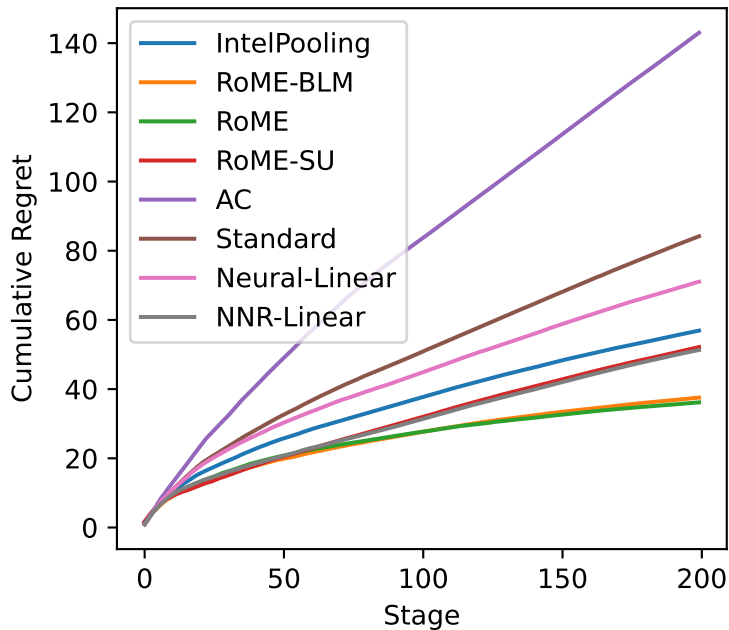

Supplement: supplementary_material [file attachment]

(a) Incremental Regret Over Time

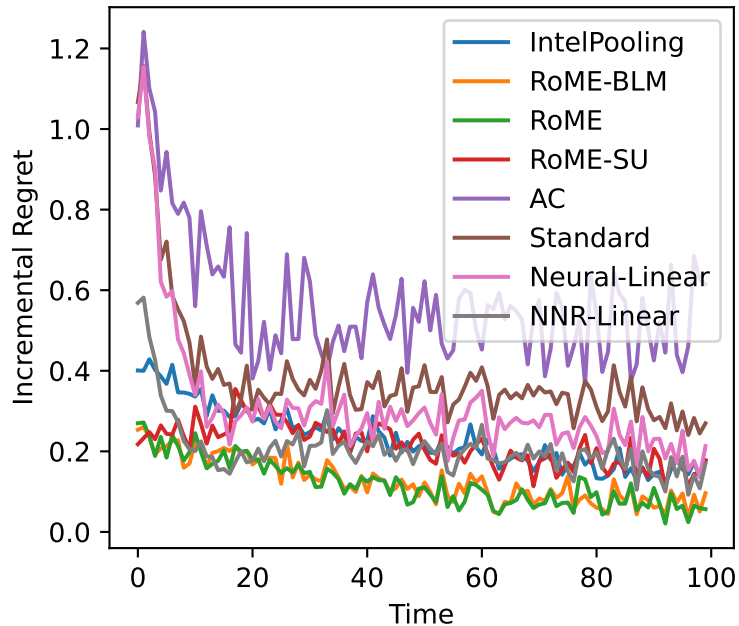

(b) Cumulative Regret Over Time

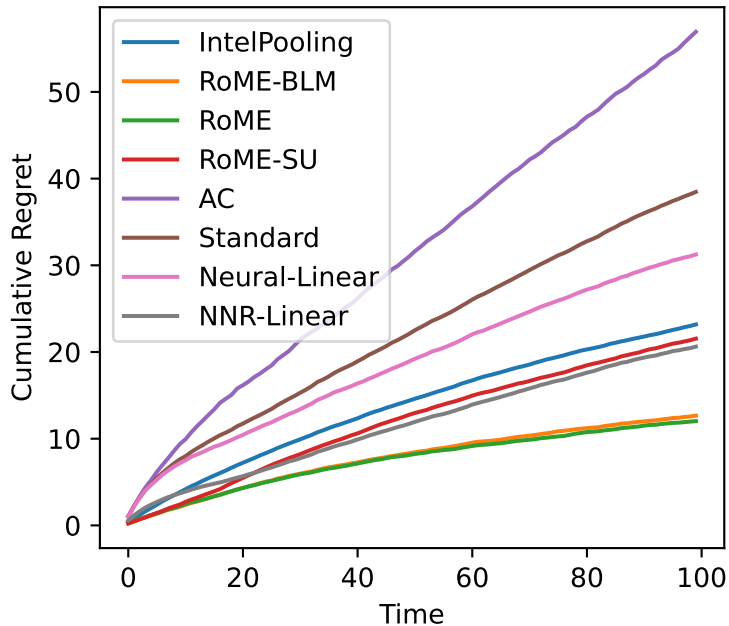

Supplement: supplementary_material [file attachment]

(c) Nonlinear Setting

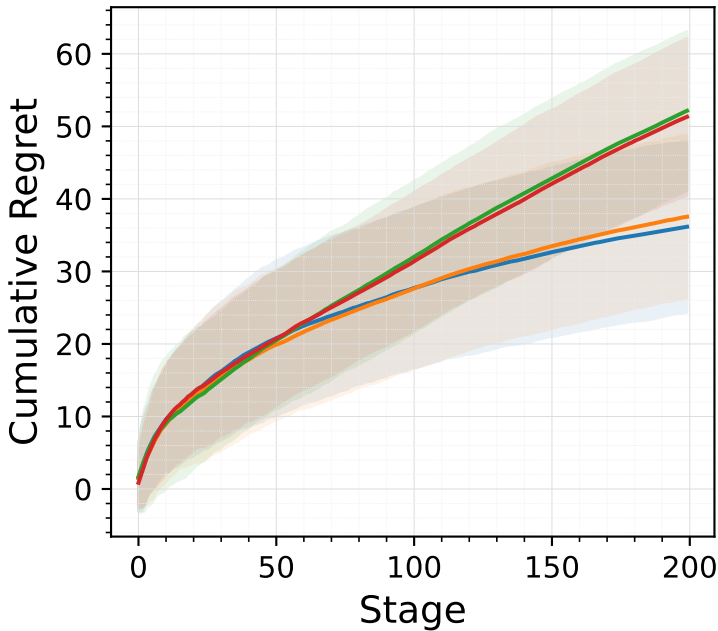

Supplement: supplementary_material [file attachment]

(a) Incremental Regret Over Time

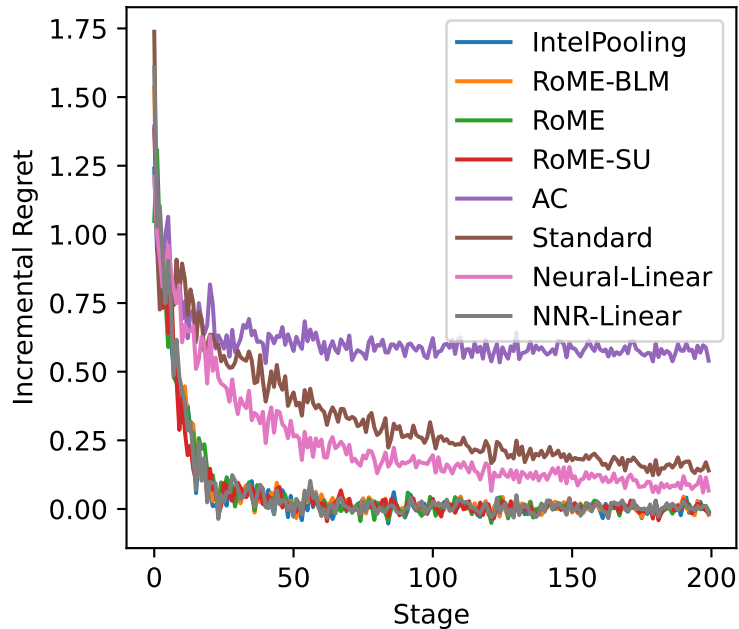

(b) Cumulative Regret Over Time

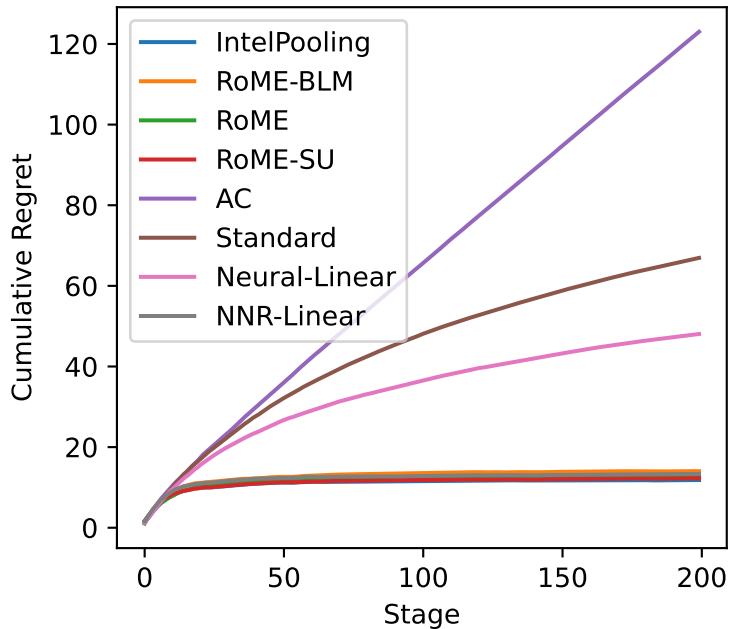

Supplement: supplementary_material [file attachment]

(a) Homogeneous Users

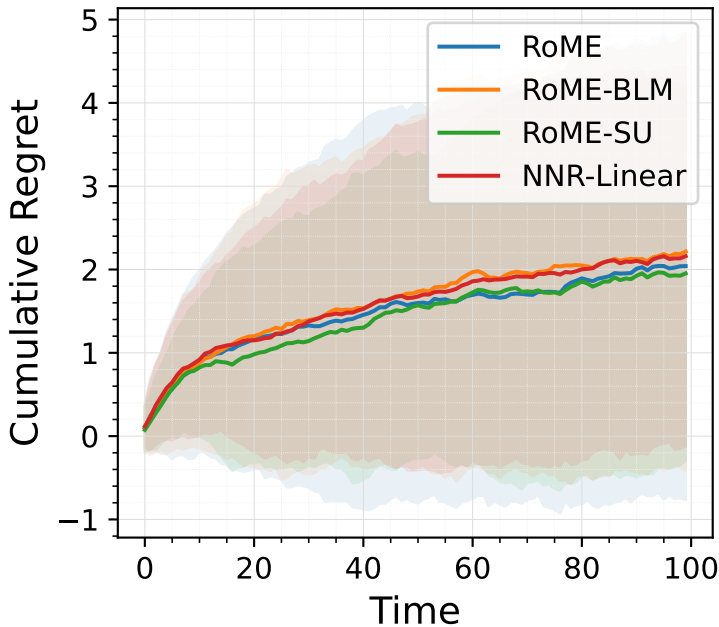

Supplement: supplementary_material [file attachment]

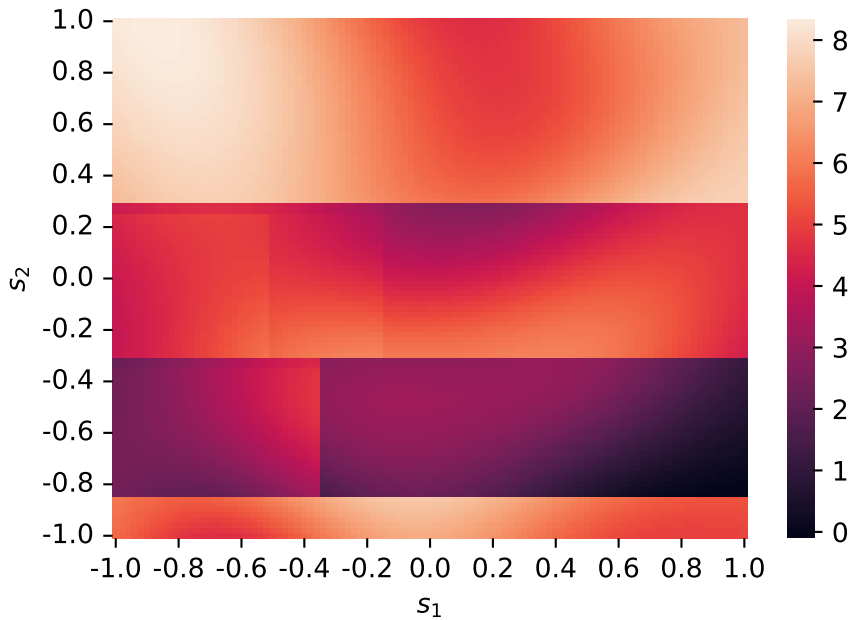

Supplement: supplementary_material [file attachment]

(c) Nonlinear Setting

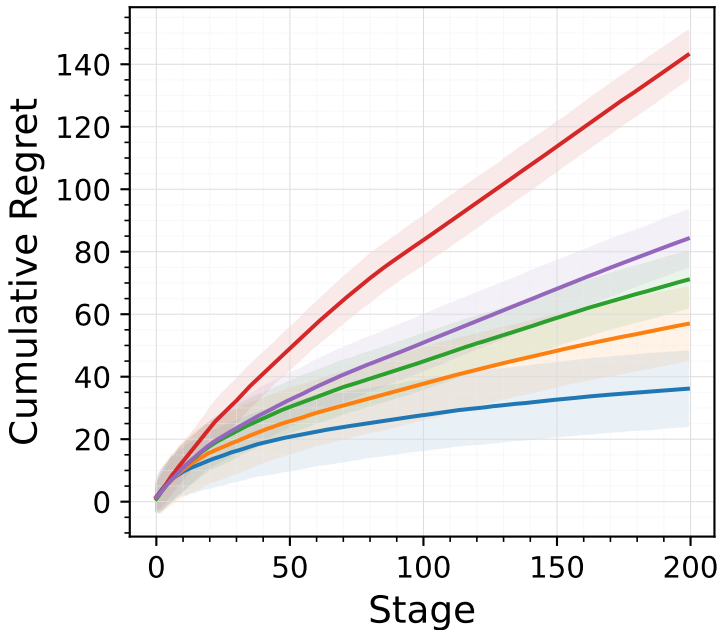

Supplement: supplementary_material [file attachment]

(c) Nonlinear Setting

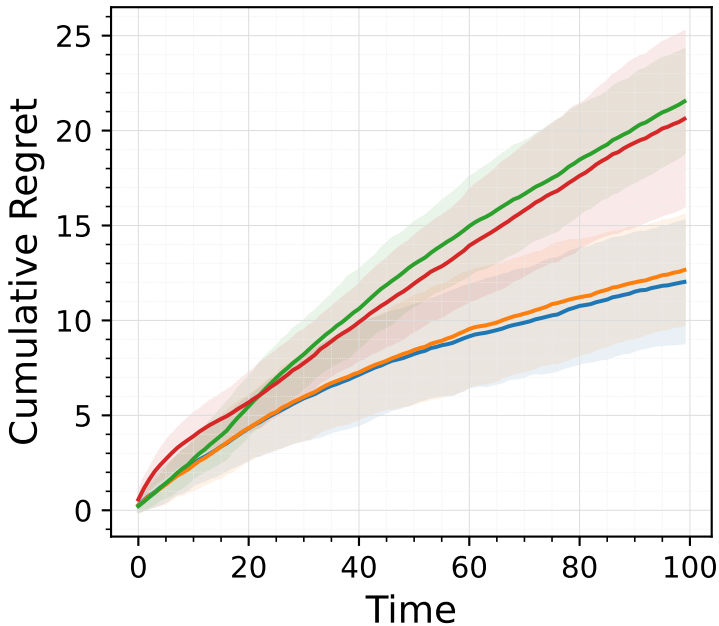

Supplement: supplementary_material [file attachment]

(a) Incremental Regret Over Time

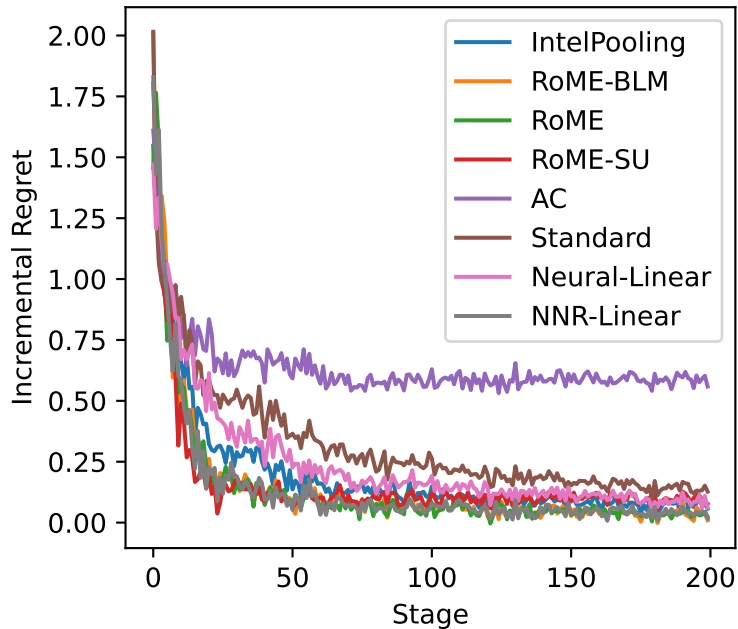

(b) Cumulative Regret Over Time

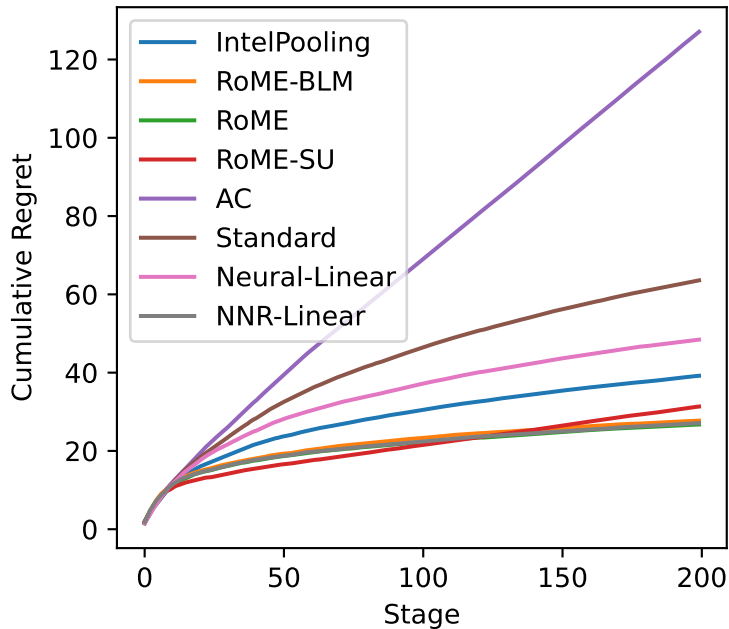

Supplement: supplementary_material [file attachment]

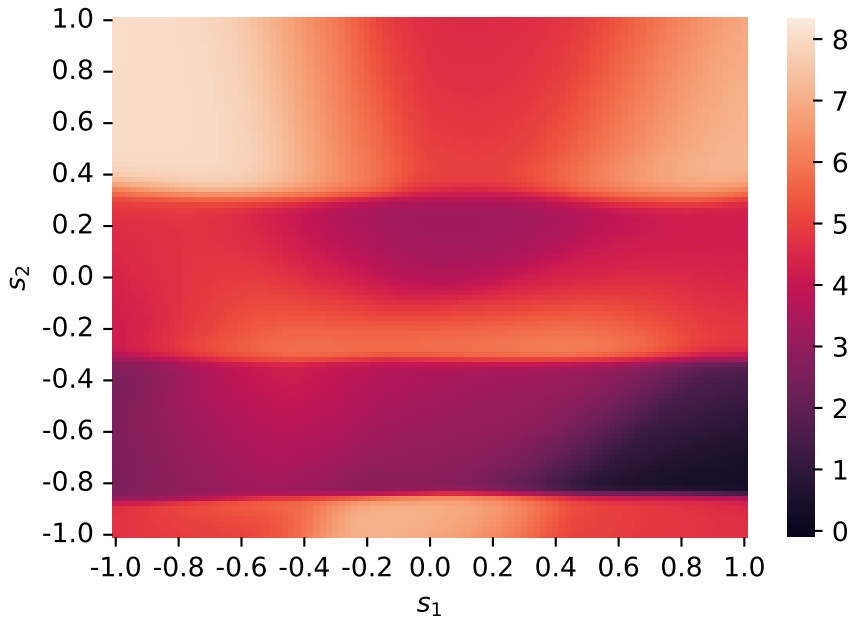

Supplement: supplementary_material [file attachment]

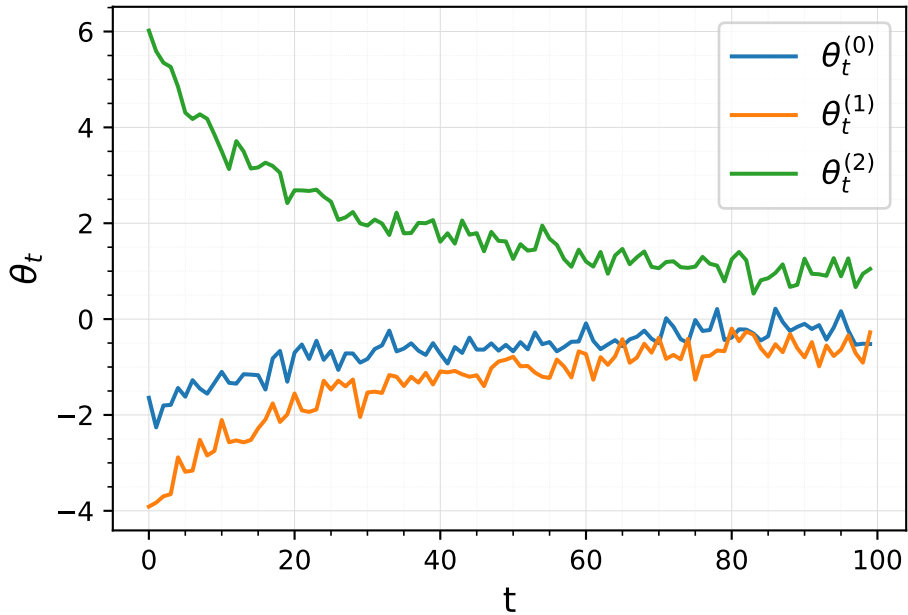

Supplement: supplementary_material [file attachment]

(b) Heterogeneous Users

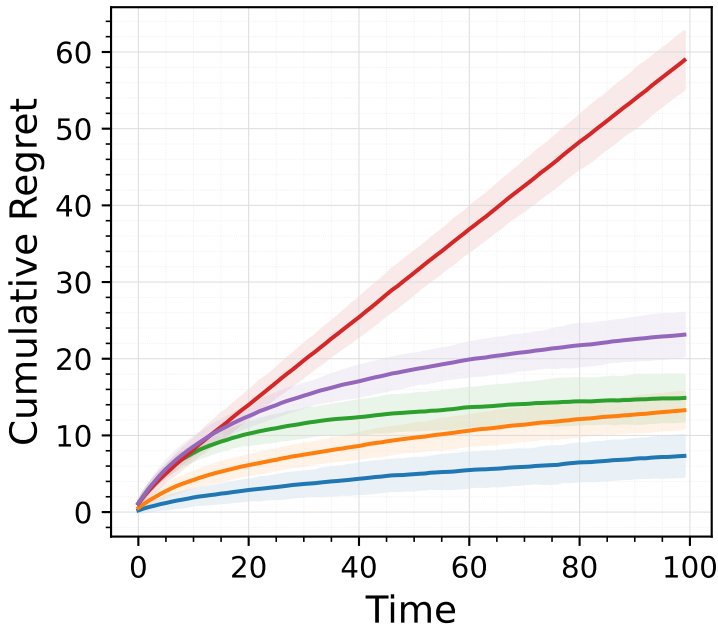

Supplement: supplementary_material [file attachment]

(b) Heterogeneous Users

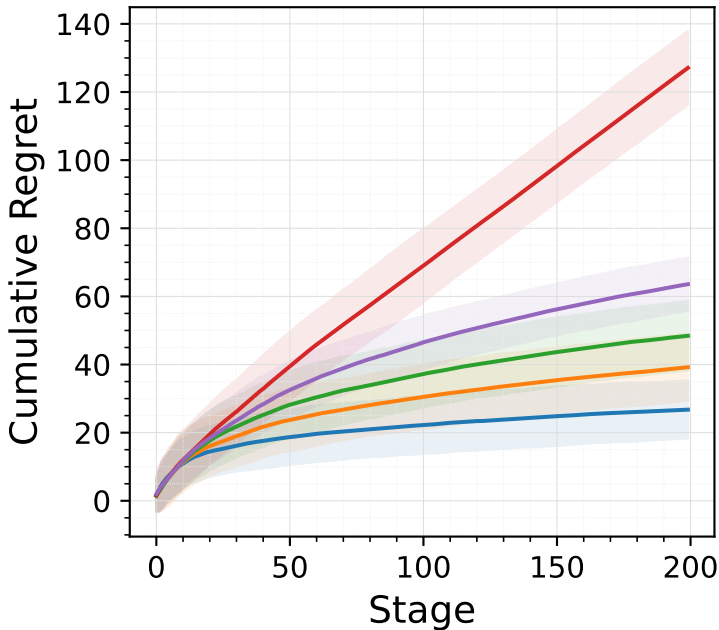

Supplement: supplementary_material [file attachment]

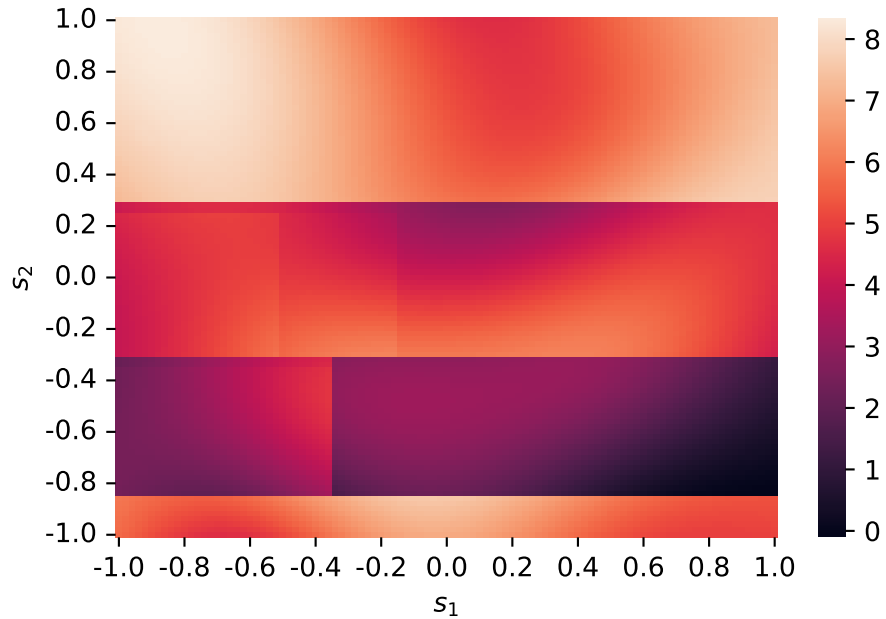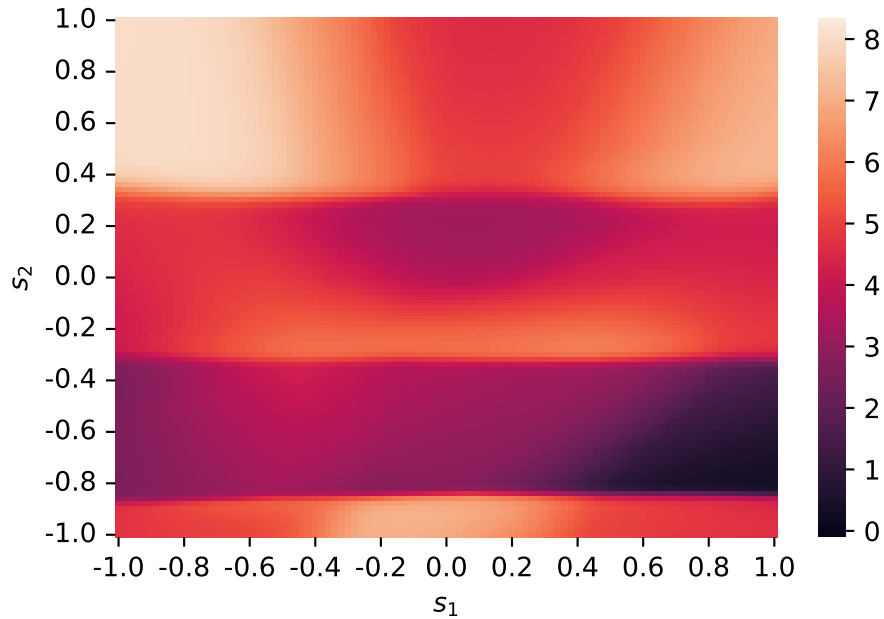

Supplement: supplementary_material [file attachment]

(a) Homogeneous Users

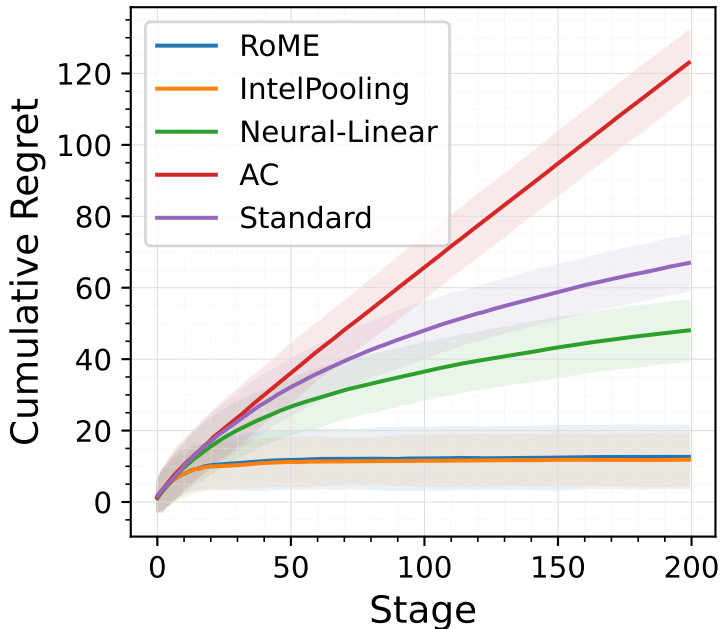

Supplement: supplementary_material [file attachment]

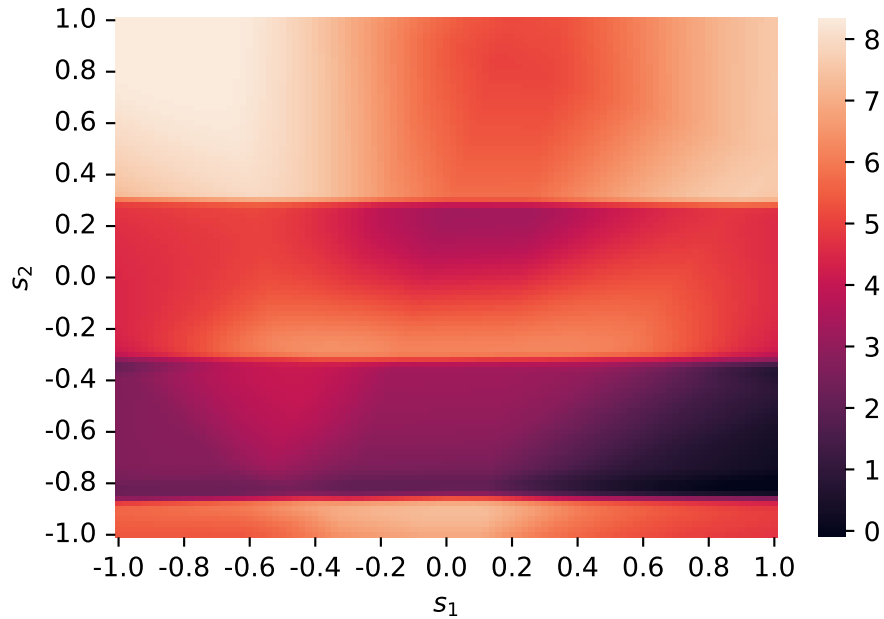

Supplement: supplementary_material [file attachment]



Supplement: supplementary_material [file attachment]

(b) Heterogeneous Users

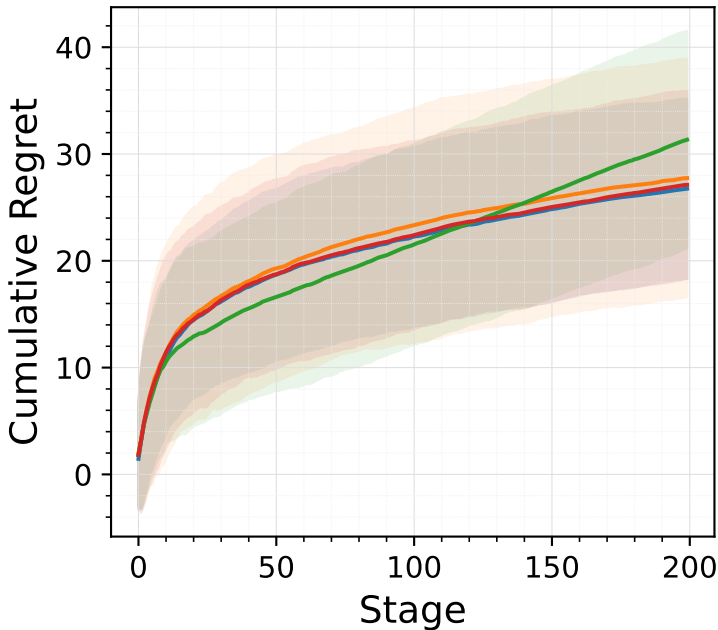

Supplement: supplementary_material [file attachment]
